# Supplementary material for: Microfluidics Formulated Liposomes of Hypoxia Activated Prodrug for Treatment of Pancreatic Cancer
Source: MDPI journal article supplement (doi:10.3390/pharmaceutics14040713), 2022-03-26
Supplement: s1 [file s1]

# Supplementary Materials: Microfluidics Formulated Liposomes of Hypoxia Activated Prodrug for Treatment of Pancreatic Cancer

Vidhi M. Shah, Craig Dorrell, Adel Al-Fatease, Brittany L. Allen-Petersen, Yeonhee Woo, Yuliya Bortnyak, Rohi Gheewala, Brett C. Sheppard, Rosalie C. Sears and Adam WG. Alani

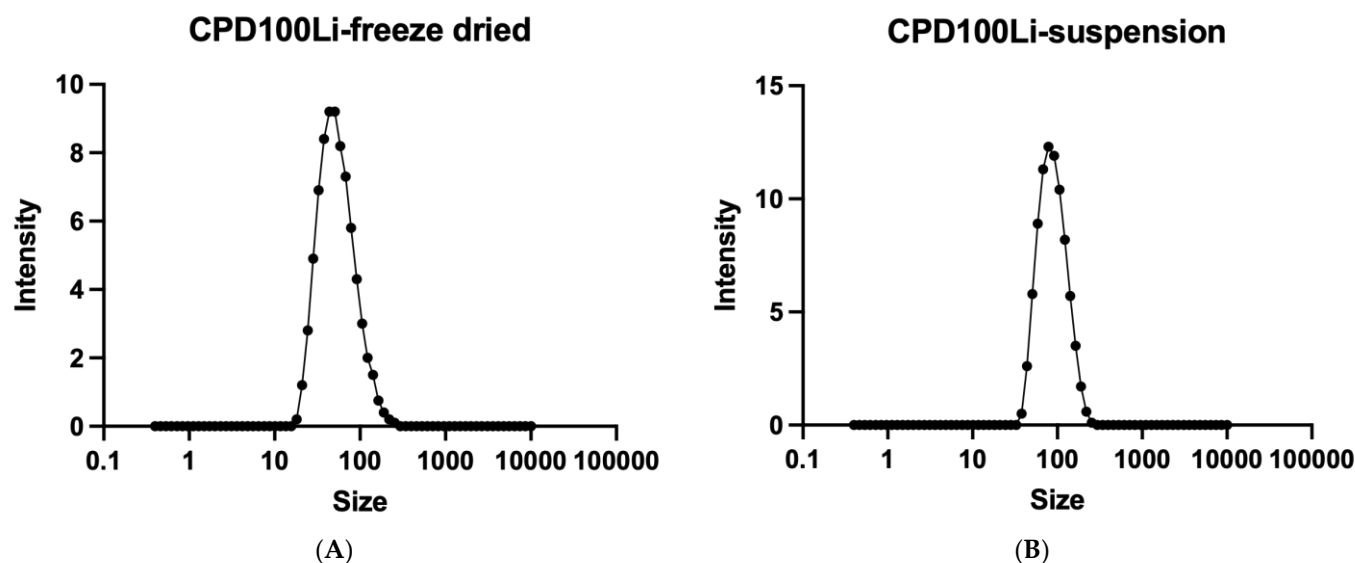

Figure S1. DLS size measurement of (A) CPD100Li-freeze dried liposomes and (B) CPD100Li-suspension.

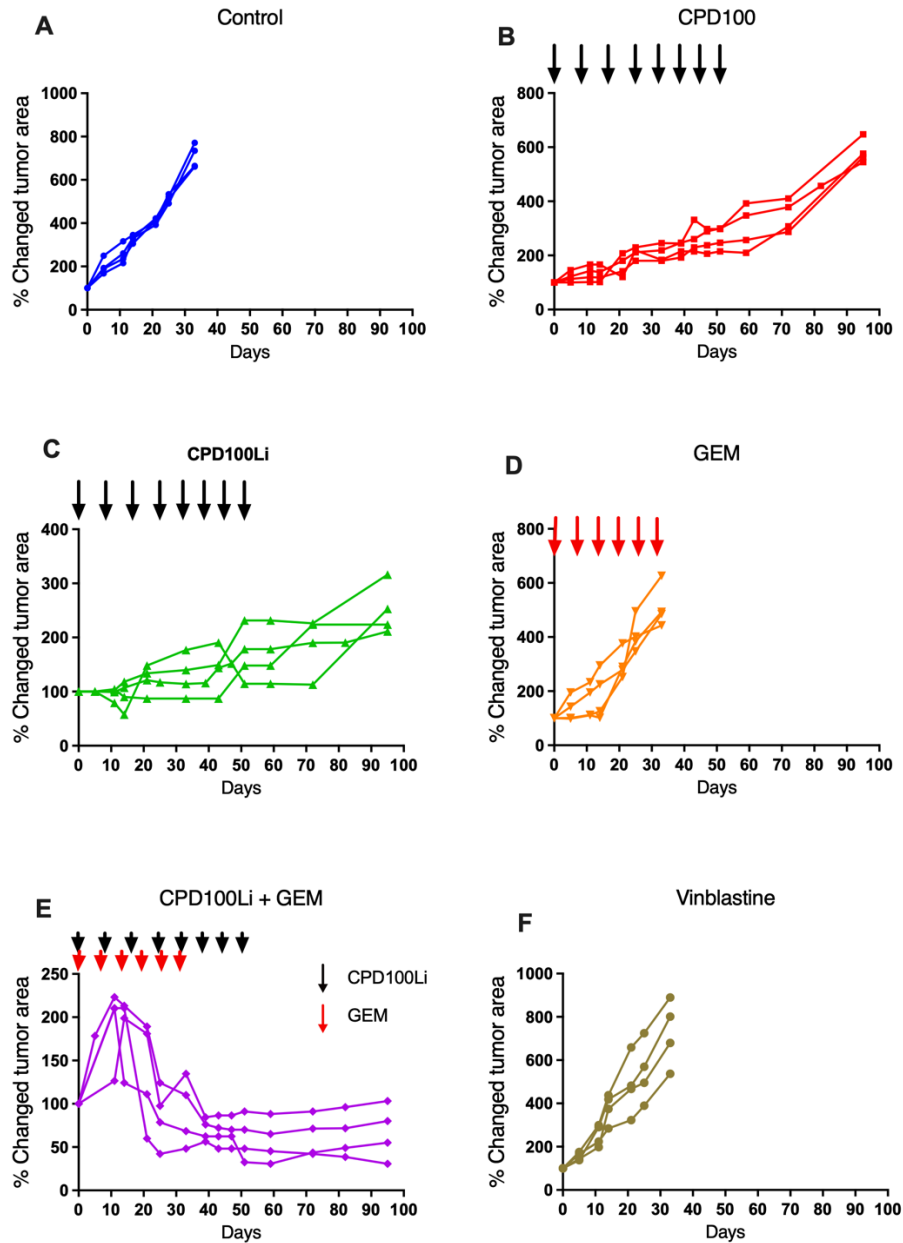

**Figure S2.** Individual tumor measurements of animal groups treated with (A) Control; (B) CPD100; (C) CPD100Li; (D) GEM; (E) CPD100Li + GEM; (F) Vinblastine.
